# Supplementary material
Source: PubMed Central journal article supplement (PMC3474199)
Supplement: NIHMS412049-supplement-1.pdf [file NIHMS412049-supplement-1.pdf]

CDR3 region variations of TRAV8  $\alpha$  and TRBV26  $\beta$  chains:

|                                      |     |     |     |            |            |            |            |     |     |     |     |     |
|--------------------------------------|-----|-----|-----|------------|------------|------------|------------|-----|-----|-----|-----|-----|
| TRBV26*01 CDR3 (Clones 1,2,4; 117T): | C   | A   | S   | S          | L          | G          | <b>T</b>   | G   | D   | Y   | E   | Q   |
|                                      | TGT | GCC | AGC | AGT        | <b>CTC</b> | <b>GGG</b> | <b>ACA</b> | GGG | GAC | TAT | GAA | CAG |
| TRBV26*01 CDR3 (Clone 3; 117L):      | C   | A   | S   | S          | L          | G          | <b>L</b>   | G   | D   | Y   | E   | Q   |
|                                      | TGT | GCC | AGC | AGT        | <b>CTG</b> | <b>GGA</b> | <b>CTG</b> | GGG | GAC | TAT | GAA | CAG |
| TRAV8-1*01 CDR3 (Clone 1; GAT):      | C   | A   | T   | D          | L          | T          | S          | G   | G   | N   | Y   | K   |
|                                      | TGT | GCT | ACT | <b>GAT</b> | <b>CTA</b> | ACC        | TCA        | GGA | GGA | AAC | TAC | AAA |
| TRAV8-1*01 CDR3 (Clones 2,3,4; GAC): | C   | A   | T   | D          | L          | T          | S          | G   | G   | N   | Y   | K   |
|                                      | TGT | GCT | ACT | <b>GAC</b> | <b>CTC</b> | ACC        | TCA        | GGA | GGA | AAC | TAC | AAA |

Supplemental Figure 1: Genetic variation in TCR  $\alpha$  and  $\beta$  chain CDR3 regions from CEA:691-699 reactive murine T cell populations. HLA-A2.1 transgenic mice were immunized with CEA:691-699. Splenocytes were subsequently stimulated with peptide in vitro, and reactive cultures were restimulated with peptide under limiting dilution conditions. From four tumor reactive murine T cell populations that were identified, TCR  $\alpha$  and  $\beta$  chains were identified using a 5' RACE technique followed by DNA sequencing. Two  $\alpha$  chains (TRAV7-D-3\*01 TRAJ15\*01 and TRAV8-1\*01 TRAJ6\*01) and two  $\beta$  chains (TRBV26\*01 TRBD1\*01 TRBJ2-7\*01 TRBC2 and TRBV3\*01 TRBD1\*01 TRBJ1-5\*01 TRBC1) were identified. Additional sequencing revealed the presence of 3  $\alpha$  chains and 3  $\beta$  chains since two genetic variations were identified within the CDR3 regions of both the TRBV26  $\beta$  chain and the TRAV8-1  $\alpha$  chain as shown.
