# Supplementary material
Source: PubMed Central journal article supplement (PMC3474199)
Supplement: NIHMS412049-supplement-3.pdf [file NIHMS412049-supplement-3.pdf]

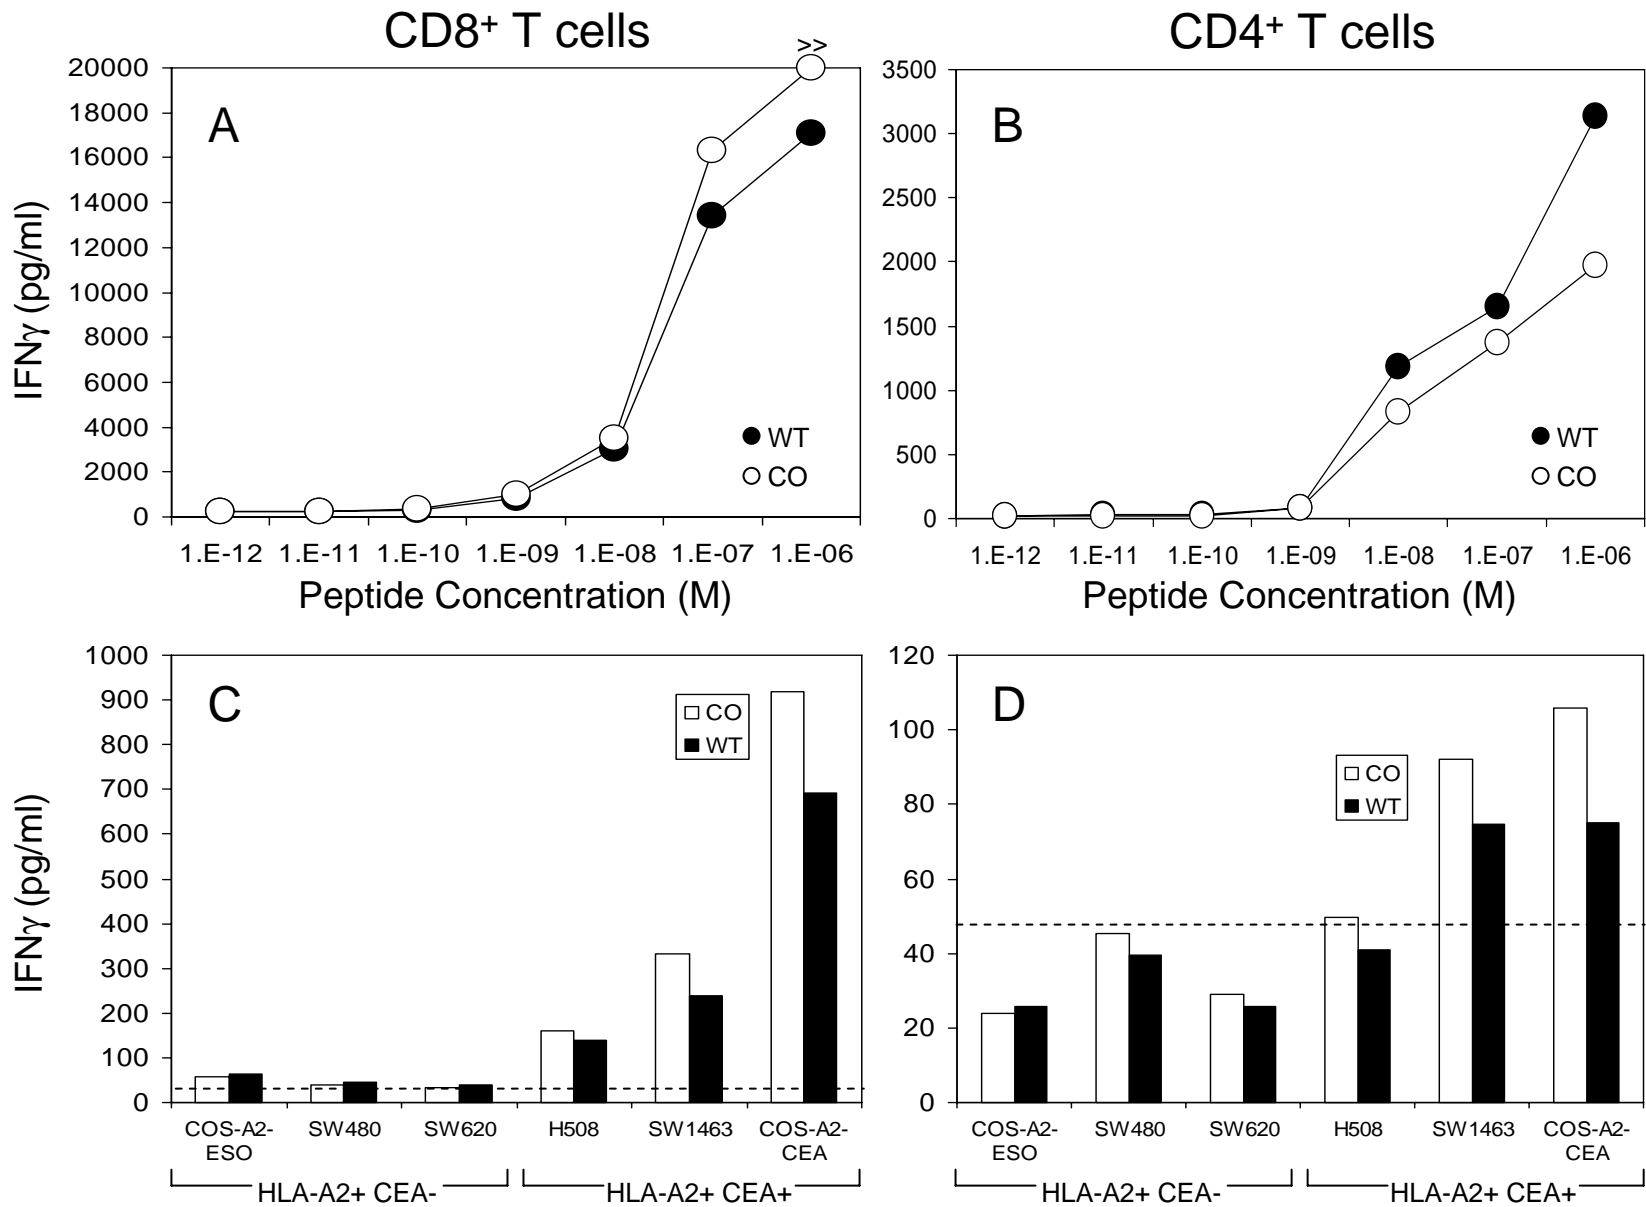

**Supplemental Figure 3: Recognition of peptide and target cells expressing HLA-A2.1 and CEA by CD8<sup>+</sup> and CD4<sup>+</sup> T cells transfected with RNAs encoding CEA:691-699 reactive TCR  $\alpha$  chains and  $\beta$  chains.** RNAs encoding wild type (WT) and codon optimized (CO) TCR  $\alpha$  and  $\beta$  chains were used to electroporate human CD8<sup>+</sup> (A and C) and CD4<sup>+</sup> (B and D) T cells previously stimulated to proliferate with anti-CD3 and IL-2. Two to four hours later, T cells were cocultured with various target cells. Approximately 20 hours later, IFN $\gamma$  secretion was measured in response to CEA:691-699 peptide-pulsed T2 cells (A and B) and HLA-A2.1+ CEA+ tumor cells or genetically engineered COS cells (C and D).
