# Supplementary material
Source: PubMed Central journal article supplement (PMC3474199)
Supplement: NIHMS412049-supplement-4.pdf [file NIHMS412049-supplement-4.pdf]

CDR3 mutations in TRAV8-1  $\alpha$  chain:

| Wt    | C | A | T | D | L        | T        | S        | G        | G        | N | Y | K |
|-------|---|---|---|---|----------|----------|----------|----------|----------|---|---|---|
| L110A |   |   |   |   | <u>A</u> | T        | S        | G        | G        |   |   |   |
| T111A |   |   |   |   | L        | <u>A</u> | S        | G        | G        |   |   |   |
| S112A |   |   |   |   | L        | T        | <u>A</u> | G        | G        |   |   |   |
| G113A |   |   |   |   | L        | T        | S        | <u>A</u> | G        |   |   |   |
| G114A |   |   |   |   | L        | T        | S        | G        | <u>A</u> |   |   |   |
| L110C |   |   |   |   | <u>C</u> | T        | S        | G        | G        |   |   |   |
| L110G |   |   |   |   | <u>G</u> | T        | S        | G        | G        |   |   |   |
| L110M |   |   |   |   | <u>M</u> | T        | S        | G        | G        |   |   |   |
| L110I |   |   |   |   | <u>I</u> | T        | S        | G        | G        |   |   |   |
| L110V |   |   |   |   | <u>V</u> | T        | S        | G        | G        |   |   |   |
| L110F |   |   |   |   | <u>F</u> | T        | S        | G        | G        |   |   |   |
| T111C |   |   |   |   | L        | <u>C</u> | S        | G        | G        |   |   |   |
| T111S |   |   |   |   | L        | <u>S</u> | S        | G        | G        |   |   |   |
| T111P |   |   |   |   | L        | <u>P</u> | S        | G        | G        |   |   |   |
| T111D |   |   |   |   | L        | <u>D</u> | S        | G        | G        |   |   |   |
| T111H |   |   |   |   | L        | <u>H</u> | S        | G        | G        |   |   |   |
| T111K |   |   |   |   | L        | <u>K</u> | S        | G        | G        |   |   |   |
| S112T |   |   |   |   | L        | T        | <u>T</u> | G        | G        |   |   |   |
| S112N |   |   |   |   | L        | T        | <u>N</u> | G        | G        |   |   |   |
| S112K |   |   |   |   | L        | T        | <u>K</u> | G        | G        |   |   |   |
