# Supplementary material
Source: PubMed Central journal article supplement (PMC3474199)
Supplement: NIHMS412049-supplement-5.pdf [file NIHMS412049-supplement-5.pdf]

### CD8<sup>+</sup> T cells

### CD4<sup>+</sup> T cells

wt

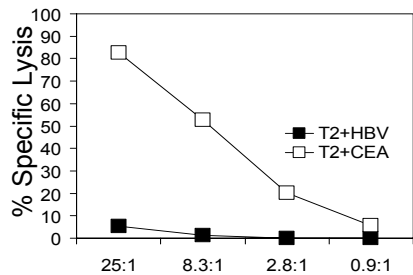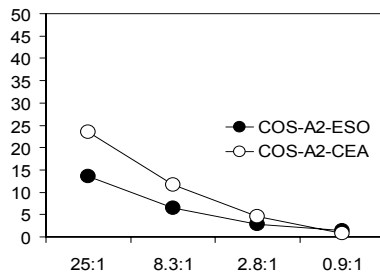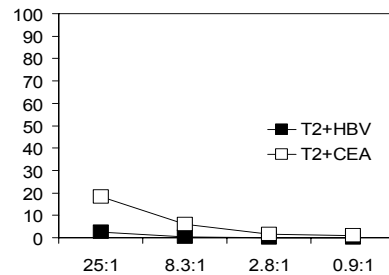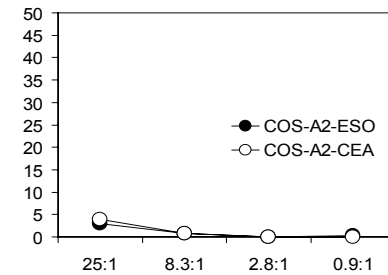

L110F

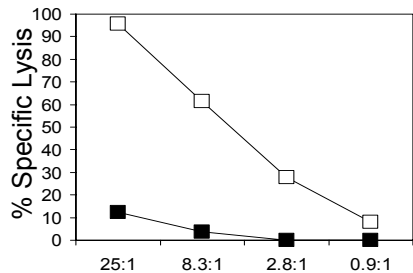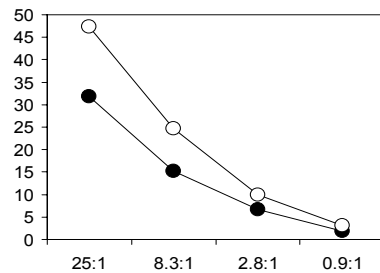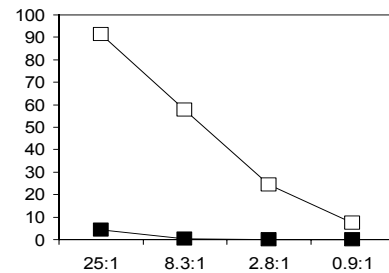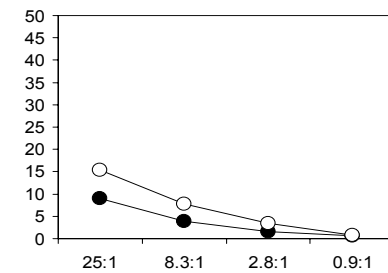

S112T

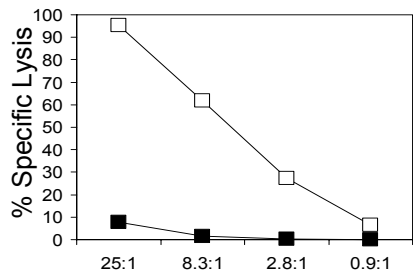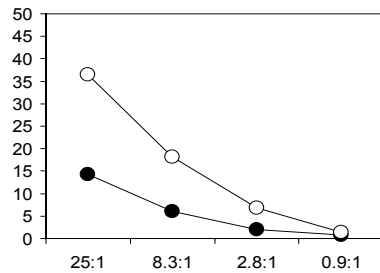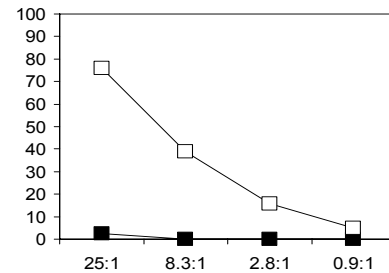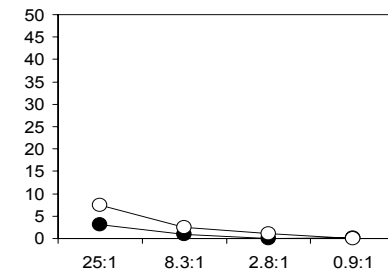

L110F  
S112T

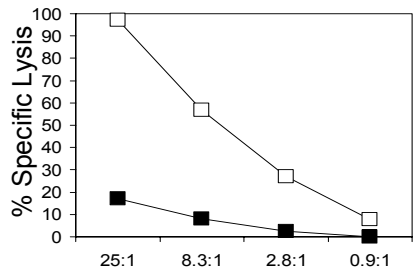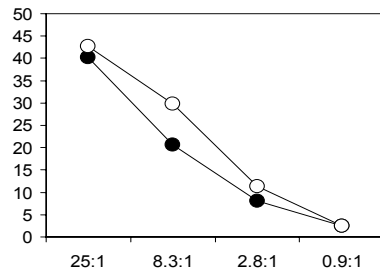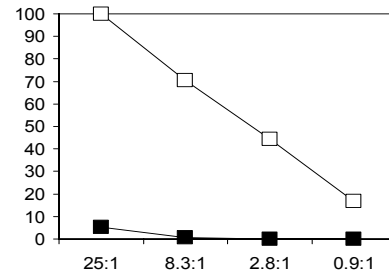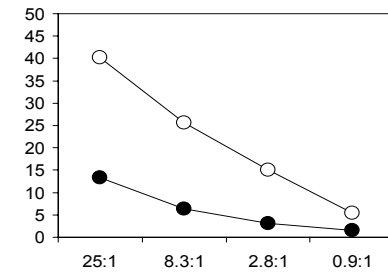

E:T Ratio

E:T Ratio

E:T Ratio

E:T Ratio

Supplemental Figure 5: Recognition of peptide and target cells expressing HLA-A2.1 and CEA by CD8+ and CD4+T cells transfected with RNAs encoding CEA:691-699 reactive TCR modified  $\alpha$  chains and wild type (wt)  $\beta$  chains. RNAs encoding TCR amino-acid substituted  $\alpha$  and wild type  $\beta$  chains were used to electroporate human CD8+ and CD4+ T cells previously stimulated to proliferate with anti-CD3 and IL-2. Approximately 24 hours later, T cell function was evaluated in a 4 hour  $^{51}\text{Cr}$  release lysis assay in response to CEA:691-699 peptide-pulsed T2 cells and COS-7 cells genetically engineered to express HLA-A2.1 and full-length CEA.
