# Supplementary material
Source: PubMed Central journal article supplement (PMC3474199)
Supplement: NIHMS412049-supplement-6.pdf [file NIHMS412049-supplement-6.pdf]

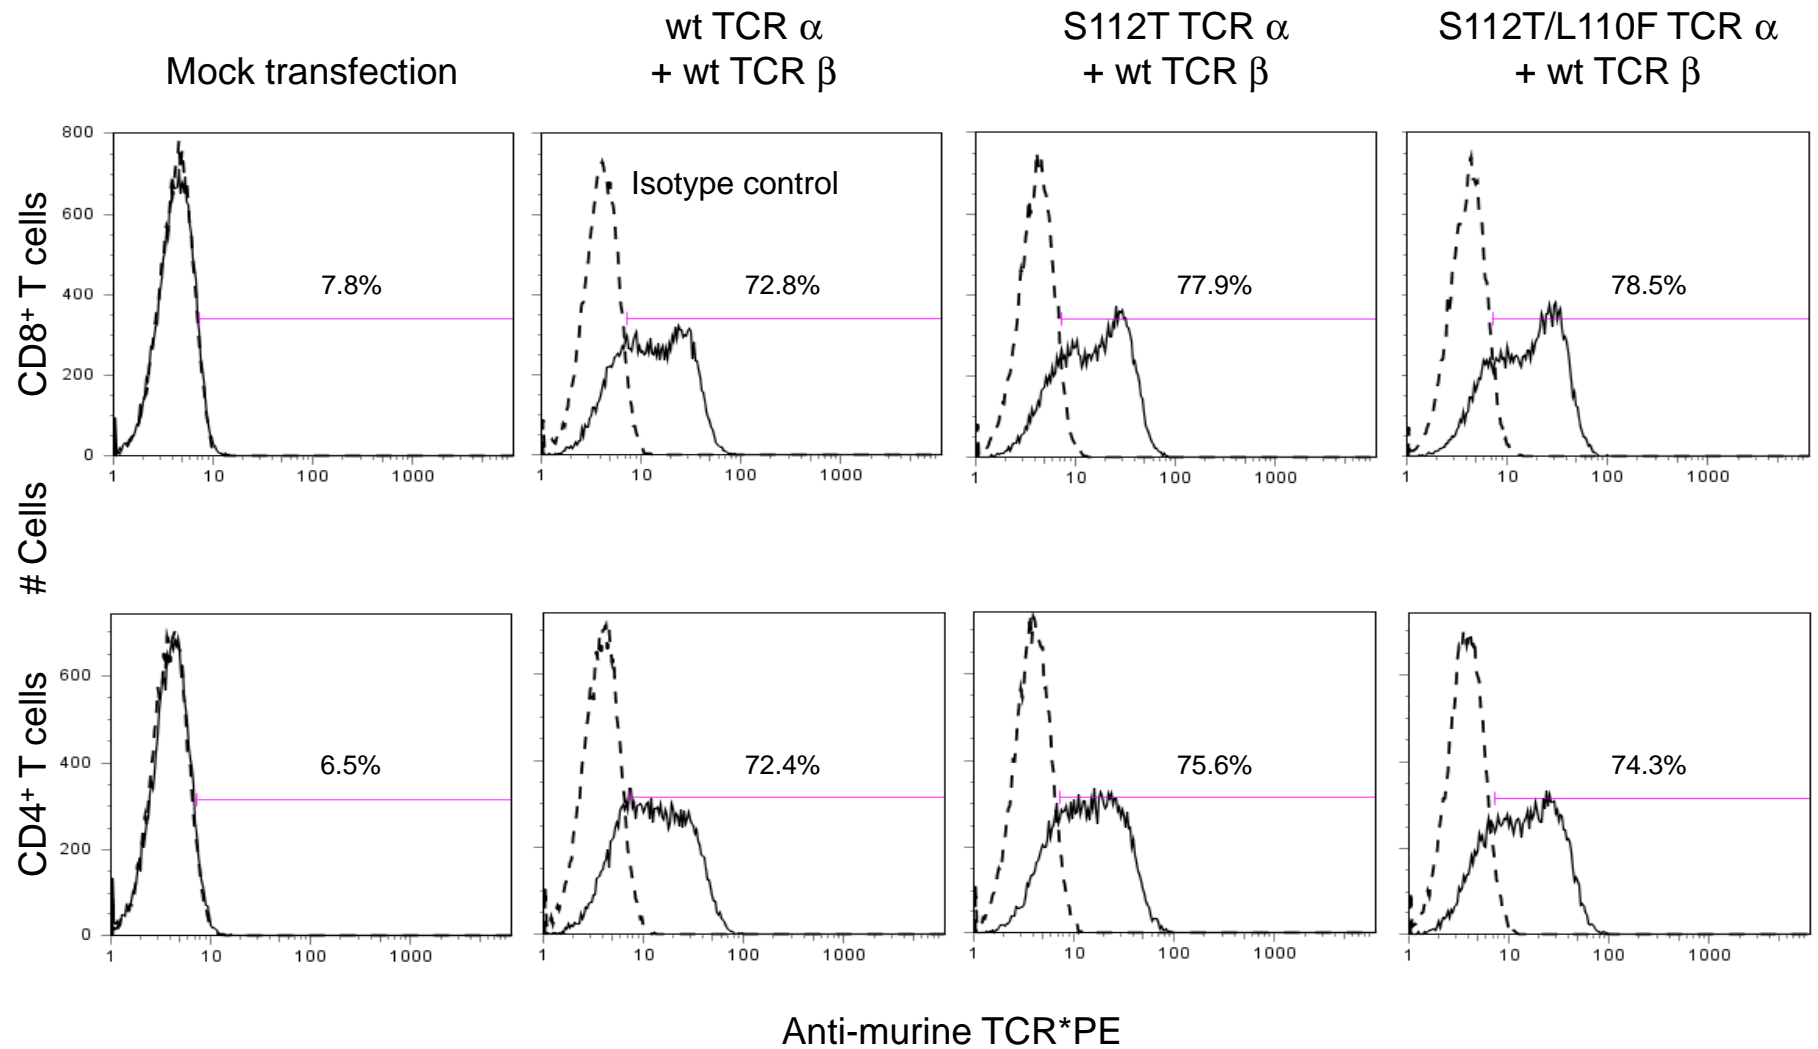

Supplemental Figure 6: Expression of murine TCR by T cells electroporated with CEA:691-699 reactive murine TCR  $\alpha$  and  $\beta$  chain RNAs. RNAs encoding wild type TCR  $\alpha$  and  $\beta$  chains and amino acid substituted TCR  $\alpha$  chains with wild type  $\beta$  chains were used to electroporate human CD8<sup>+</sup> and CD4<sup>+</sup> T cells previously stimulated to proliferate with anti-CD3 and IL-2. TCR expression was evaluated approximately 24 hours later by FACS using a monoclonal antibody against the constant region of the murine  $\beta$  chain.
