# Supplementary material
Source: PubMed Central journal article supplement (PMC3474199)
Supplement: NIHMS412049-supplement-Table_1.pdf [file NIHMS412049-supplement-Table_1.pdf]

Supplemental Table 1: Cross-recognition of homologous peptides from other CEA protein family members by CD8+ T cells transfected with RNAs encoding modified TCR  $\alpha$  chains and wt  $\beta$  chains derived from CEA:691-699 reactive murine T cell clones\*

|                        | CEACAM5<br>691-699<br>(IMIGVLVGV) | CEACAM3/21:<br>240-248<br>(ILIGVLVGS) | CEACAM4:36/3:<br>156-164<br>(IVTGVLVGV) | CEACAM8:<br>338-347<br>(IMIGVLARV) | CEACAM7/2a:<br>254-262<br>(IMIGVLAGM) | HBVc:<br>18-27(23Y)<br>(FLPSDYFPSV) |
|------------------------|-----------------------------------|---------------------------------------|-----------------------------------------|------------------------------------|---------------------------------------|-------------------------------------|
| <u>wt</u>              |                                   |                                       |                                         |                                    |                                       |                                     |
| T2+10 <sup>-12</sup> M | 96                                | 54                                    | 59                                      | 47                                 | 52                                    | -                                   |
| T2+10 <sup>-11</sup> M | 80                                | 46                                    | 62                                      | 60                                 | 49                                    | -                                   |
| T2+10 <sup>-10</sup> M | <u>842</u> <sup>†</sup>           | 44                                    | 32                                      | 48                                 | 46                                    | -                                   |
| T2+10 <sup>-9</sup> M  | <u>&gt;1000</u>                   | 40                                    | 48                                      | 53                                 | 58                                    | -                                   |
| T2+10 <sup>-8</sup> M  | <u>&gt;1000</u>                   | 60                                    | 56                                      | 48                                 | 53                                    | -                                   |
| T2+10 <sup>-7</sup> M  | <u>&gt;1000</u>                   | <u>322</u>                            | 87                                      | 45                                 | 77                                    | -                                   |
| T2+10 <sup>-6</sup> M  | <u>&gt;1000</u>                   | <u>895</u>                            | <u>160</u>                              | 60                                 | 57                                    | 44                                  |
| <u>S112T</u>           |                                   |                                       |                                         |                                    |                                       |                                     |
| T2+10 <sup>-12</sup> M | 128                               | 66                                    | 52                                      | 44                                 | 62                                    | -                                   |
| T2+10 <sup>-11</sup> M | <u>505</u>                        | 45                                    | 44                                      | 40                                 | 78                                    | -                                   |
| T2+10 <sup>-10</sup> M | <u>&gt;1000</u>                   | 77                                    | 76                                      | 70                                 | 71                                    | -                                   |
| T2+10 <sup>-9</sup> M  | <u>&gt;1000</u>                   | <u>353</u>                            | <u>&gt;1000</u>                         | 55                                 | 67                                    | -                                   |
| T2+10 <sup>-8</sup> M  | <u>&gt;1000</u>                   | <u>&gt;1000</u>                       | <u>&gt;1000</u>                         | <u>312</u>                         | 75                                    | -                                   |
| T2+10 <sup>-7</sup> M  | <u>&gt;1000</u>                   | <u>&gt;1000</u>                       | <u>&gt;1000</u>                         | <u>&gt;1000</u>                    | 67                                    | -                                   |
| T2+10 <sup>-6</sup> M  | <u>&gt;1000</u>                   | <u>&gt;1000</u>                       | <u>&gt;1000</u>                         | <u>&gt;1000</u>                    | 54                                    | 81                                  |
| <u>L110F S112T</u>     |                                   |                                       |                                         |                                    |                                       |                                     |
| T2+10 <sup>-12</sup> M | 283                               | 170                                   | 128                                     | 286                                | 186                                   | -                                   |
| T2+10 <sup>-11</sup> M | <u>&gt;1000</u>                   | 317                                   | 146                                     | 218                                | 213                                   | -                                   |
| T2+10 <sup>-10</sup> M | <u>&gt;1000</u>                   | <u>&gt;1000</u>                       | 188                                     | 172                                | 252                                   | -                                   |
| T2+10 <sup>-9</sup> M  | <u>&gt;1000</u>                   | <u>&gt;1000</u>                       | 351                                     | 167                                | 303                                   | -                                   |
| T2+10 <sup>-8</sup> M  | <u>&gt;1000</u>                   | <u>&gt;1000</u>                       | <u>&gt;1000</u>                         | 393                                | <u>720</u>                            | -                                   |
| T2+10 <sup>-7</sup> M  | <u>&gt;1000</u>                   | <u>&gt;1000</u>                       | <u>&gt;1000</u>                         | <u>&gt;1000</u>                    | <u>&gt;1000</u>                       | -                                   |
| T2+10 <sup>-6</sup> M  | <u>&gt;1000</u>                   | <u>&gt;1000</u>                       | <u>&gt;1000</u>                         | <u>&gt;1000</u>                    | <u>&gt;1000</u>                       | 199                                 |

\* IFN $\gamma$  secretion (pg/ml) in 20 hr coculture supernatants of target cells with electroporated human CD8+ T cells

<sup>†</sup> Underlined values for peptide-pulsed targets indicate that IFN $\gamma$  release in response to T2 cells pulsed with the indicated concentration of CEA:691-699 was  $\geq$ 50 pg/ml and at least twice background with media and T2 cells preloaded with 1  $\mu$ g/ml of the negative control peptide HBVc:18-27(23Y).
